# Supplementary figures and images for: Study of Quantitative Trait Loci (QTLs) Associated with Allelopathic Trait in Rice
Source: MDPI journal article supplement (doi:10.3390/genes11050470), 2020-04-26

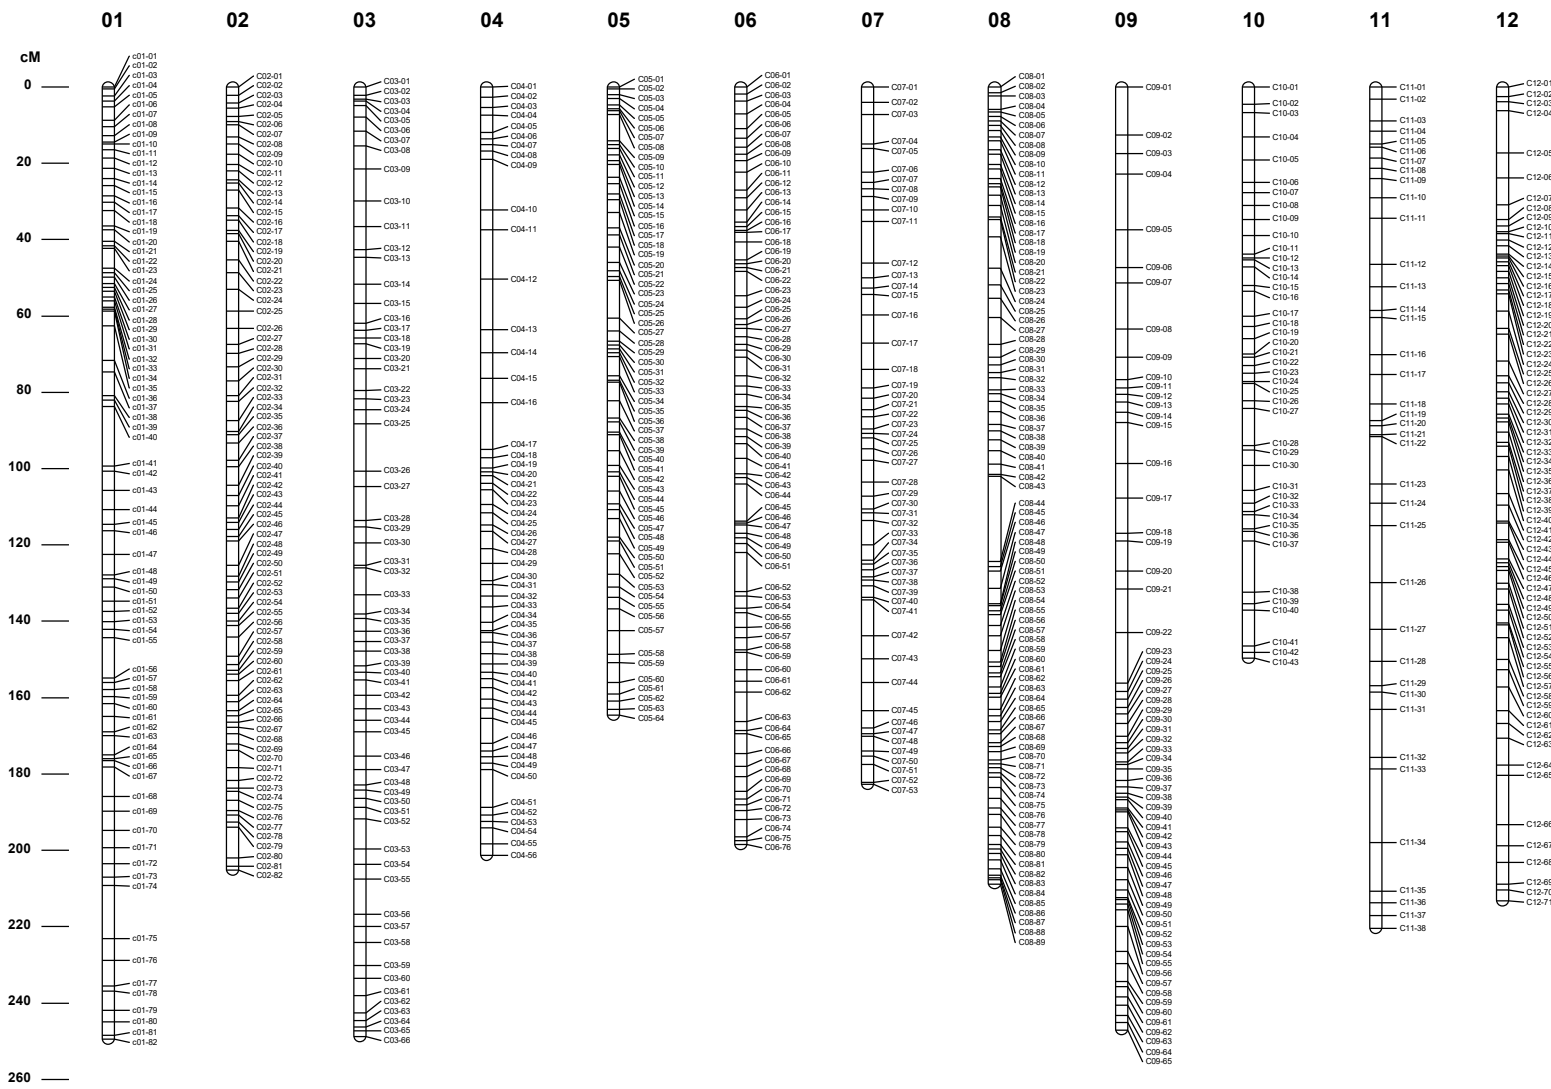

Supplement: s1 [file s1]
